# Supplementary material for: Differentiation alters stem cell nuclear architecture, mechanics, and mechano-sensitivity
Source: eLife. 2016 Nov 30;5:e18207. doi: 10.7554/eLife.18207 (PMC5148611; doi:10.7554/eLife.18207)
Supplement: Figure 1—source data 1. — DOI: http://dx.doi.org/10.7554/eLife.18207.003 [file elife-18207-fig1-data1.xlsx]

## Sheet: Fig 1 c
	Day 1							Day 3							Day 5							Day 7							Day 10
	Diff_0%	Diff_10%		Ctrl_0%	Ctrl_10%			Diff_0%	Diff_10%		Ctrl_0%	Ctrl_10%			Diff_0%	Diff_10%		Ctrl_0%	Ctrl_10%			Diff_0%	Diff_10%		Ctrl_0%	Ctrl_10%			Diff_0%	Diff_10%		Ctrl_0%	Ctrl_10%
	1.36705	2.24787		1.88457	1.88472			1.38076	1.60654		1.91884	1.98531			1.43426	1.60099		1.77921	1.90056			1.58807	1.67006		1.65857	2.23819			1.29347	1.5909		1.6351	2.25494
	1.75338	1.89474		1.76239	2.33197			1.80737	1.45554		1.49124	2.8301			1.66015	2.42383		1.55727	2.57494			1.85463	1.8213		1.49775	1.71966			1.31348	1.49235		1.80236	1.76805
	1.40518	2.01761		1.68369	1.7307			1.36593	1.87384		1.58737	2.0666			1.30135	1.37311		1.46044	1.81071			1.61041	1.6716		1.36299	1.95134			1.91835	1.6965		2.07162	2.06908
	1.67789	2.06893		1.72361	1.80742			1.5115	1.54132		1.72567	1.95832			1.8709	1.38652		1.43152	1.99284			1.63549	1.481		1.5532	1.57871			2.12236	1.63864		1.64971	2.17821
	1.38983	1.89012		1.88465	2.09947			2.13041	1.959		1.58885	2.02547			1.69949	1.44821		1.85832	1.55212			1.44299	1.62085		2.1708	1.99174			1.47111	1.8798		1.77199	2.54167
	1.716	2.04128		1.64664	1.86552			1.31026	1.71532		1.1277	2.34232			1.73456	1.60066		1.44597	2.03045			1.07643	1.28629		1.87821	1.75136			1.56977	1.91024		1.61237	2.25617
	1.42282	2.39933		1.68884	2.60193			1.50109	1.49776		1.67146	2.18287			1.36236	1.49191		1.55132	1.90236			1.25302	1.61043		1.65966	2.54013			1.55322	2.02311		1.44371	1.92198
	1.6178	2.03542		1.80433	2.09611			1.21415	1.55598		1.80808	2.00216			1.47385	1.83101		1.71689	1.74147			1.76939	1.63032		1.57299	1.69858			1.55908	1.55421		1.81123	2.12397
	1.49327	2.1278		1.41525	2.17135			1.48667	1.45052		1.45513	2.1313			1.38171	1.35925		1.73971	2.66461			1.43637	1.74642		1.54213	2.02151			1.70753	1.57995		1.40993	2.35334
	2.04253	1.91037		1.41214	2.00437			1.73824	1.47002		1.52598	2.02704			1.46235	1.99088		1.88819	2.73562			1.49183	1.70887		1.62312	2.37407			1.55224	1.688		1.04666	3.12403
	1.75852	2.067		1.61005	2.39438			1.41654	1.85615		1.70804	2.23891			1.91039	1.23095		1.30413	1.80905			1.61307	1.47363		1.41862	2.31689			1.41666	1.4813		1.69652	2.31818
	1.70652	2.03923		1.72307	2.04739			1.08336	1.44513		1.83736	2.60951			1.32604	1.64259		1.58485	2.61641			1.82734	1.24763		1.74348	2.03731			1.57037	1.99544		1.78582	2.05658
	1.67345	2.04089		1.39774	1.49904			1.50077	2.2708		1.79721	3.27639			2.33048	1.53114		1.5825	2.18631			1.68721	1.38701		1.50081	2.08744			2.07819	1.42739		1.69987	2.34602
	1.92313	2.07806		1.28871	1.84079			1.88931	1.91245		1.68133	2.57752			1.50864	1.22177		1.96003	2.29926			1.80195	1.40847		1.68184	2.0236			1.25812	1.3954		1.80745	1.84322
	2.15916	2.24911		2.00582	2.03216			2.04113	2.33014		1.4394	2.21586			1.67718	1.38507		1.9191	1.72288			1.63915	1.61705		1.49965	2.00051			1.49997	1.23454		1.5305	1.94353
	1.5707	2.46049		1.53593	2.56973			2.1785	1.92483		2.02888	2.32652			1.84849	1.45037		1.90415	2.20565			1.58358	1.42151		1.45789	1.57853			1.22235	1.34342		1.64982	2.04822
	1.69211	2.08532		1.53345	2.0865			1.28204	2.2445		1.66492	2.00756			1.77398	1.54266		1.24272	2.64445			1.44354	1.5503		1.80251	2.35394			1.85624	1.91863		1.70575	2.15877
	1.63967	2.05329		2.26367	2.22038			1.82536	1.88944		1.30358	2.31514			1.97965	1.5841		1.48226	2.40205			2.03546	1.33323		1.86374	1.96652			1.33947	1.65139		1.85097	2.55403
	1.80965	2.23474		2.0295	2.53204			1.60425	2.26475		1.19068	2.73607			1.423	1.66067		1.47123	1.81585			1.41025	1.81925		1.52876	2.11193			1.95176	1.70269		1.38116	2.75125
	1.88889	1.60984		1.54781	2.02135			1.15861	1.9197		1.47911	2.24754			1.59244	1.50704		1.6353	1.76873			1.3711	1.54321		1.75274	1.55904			1.6151	1.62061		1.84005	2.20302
	1.69563	2.16371		1.49805	1.68327			2.21021	1.77328		1.61802	2.34165			1.44946	1.5952		1.83366	2.23077			1.74229	1.66933		1.69642	2.42388			1.86447	2.48054		1.53883	2.00513
	1.55146	1.63024		1.56064	1.57449			1.45761	2.10163		1.58343	1.79725			1.64274	1.52944		1.30229	1.76554			1.78674	1.77612		1.5755	2.0242			1.23707	1.35326		1.52933	1.57539
	1.60451	2.08299		1.42932	2.37097			1.48545	1.52124		1.54664	2.3228			1.45454	1.98513		1.69164	2.47466			1.37878	1.18175		2.20018	2.14088			1.3591	1.91745		1.36524	2.76143
	1.61846	2.81813		1.62438	1.89957			1.27047	1.81396		1.62977	1.82338			1.90673	1.84632		1.91074	1.9256			1.31795	1.10155		1.75548	1.34636			1.57576	1.60536		1.65546	2.20742
	1.63639	1.87189		1.46885	2.22562			1.15547	2.0896		1.34343	2.16626			1.76445	1.84613		1.73643	1.79058			2.14793	1.72285		1.83826	1.58635			1.9334	2.11789		1.99206	2.38927
	1.06777	1.59919		1.73235	1.7376			1.43122	1.80845		1.81537	2.2678			1.9797	1.82685		1.51286	2.14158			1.64508	1.44649		1.71808	2.68238			1.97185	2.12296		1.46149	1.93482
	1.88077	2.33845		1.65301	2.47195			1.1576	1.56256		2.0956	2.57008			1.42866	1.4953		1.53311	1.92656			1.69695	2.02086		1.67771	1.71754			2.09455	1.84008		1.68455	2.01163
	1.35265	3.12216		1.25977	2.10348			1.58692	2.22417		1.81831	1.72482			1.66866	1.88656		1.52255	1.48213			1.65667	2.35468		1.67468	1.88554			2.02616	1.71448		1.35242	2.33667
	1.85267	1.93363		1.59483	2.19742			1.50888	1.68669		1.62789	1.96074			1.82032	1.88922		2.00357	1.55524			1.83222	2.25002		1.80177	2.15522			2.03056	1.76224		1.49388	1.87413
	1.71716	1.93513		1.36126	1.62036			1.67967	1.89971		1.44016	1.75911			1.45132	1.58078		1.45532	1.60415			1.64587	1.95863		1.76494	2.41863			1.35537	2.0885		2.18279	1.89318
	1.40564	1.88133		1.65982	1.81914			1.64121	1.9567		1.48403	1.88939			1.84022	2.17508		1.5206	1.79027			1.93175	2.08402		2.03374	2.5145			2.04451	1.7857		1.48932	2.36855
	1.53461	2.19441		1.39604	2.71753			1.93101	1.96876		1.40448	2.52433			1.8938	1.81601		2.00805	1.84046			1.54276	1.86823		1.79865	1.67508			1.6533	1.64858		2.03223	1.80431
	1.43944	2.46715		1.72242	2.41821			1.41005	2.01706		1.44513	2.23953			1.76462	1.46307		1.85881	2.02211			1.94489	1.80285		1.59088	2.1937			1.75992	1.7896		1.52831	2.45591
	1.46357	2.07602		1.341	2.74079			1.70356	1.8236		1.44686	2.61077			1.63651	1.75932		1.67389	1.58792			1.89187	1.95108		1.76006	1.78452			1.24573	1.59403		1.67703	1.99674
	1.62007	1.95344		1.58781	1.72244			1.31223	1.58127		1.58318	2.25321			1.66816	1.60622		1.41612	2.03513			1.73109	1.44581		1.64566	2.16573			1.38972	1.71695		1.9626	2.21799
	1.21077	1.8993		1.45885	1.78473			1.66431	1.54907		1.87591	2.12132			1.79265	1.72096		1.72104	2.32135			1.54449	1.65		1.82091	1.87176			1.83513	1.62131		1.36542	1.94569
	1.58991	1.84406		2.15423	2.1703			1.64801	1.95513		2.43428	2.09247			1.5401	1.84132		1.50003	1.89874			1.84761	1.99601		1.69659	2.49012			1.59695	2.02306		1.98558	2.10823
	2.04617	2.01284		1.64373	1.83647			1.25257	1.45674		1.71791	2.15655			2.0538	1.61647		1.68284	2.4897			1.57709	1.99754		1.26411	1.74395			1.18866	1.60853		1.8081	2.02628
	1.68433	1.87392		1.82251	2.22346			2.01242	1.57059		2.0312	2.00214			1.50997	1.81015		1.58631	2.04173			1.81971	1.83025		1.60214	1.74526			1.80953	2.20501		1.67312	2.09929
	1.62539	1.97813		1.61089	2.0783			1.66513	2.35329		1.31508	1.8688			1.22655	1.58297		1.60805	2.1899			1.72821	1.20976		1.37662	1.98132			2.28556	1.55123		1.87237	2.43459
	1.47793	2.21933		1.74976	1.9398			1.6227	2.16202		1.53416	2.0039			1.79637	1.47631		1.4401	2.51479			1.73528	1.7158		1.86043	2.02322			1.87026	1.25132		1.24296	1.87531
	1.49997	2.04219		1.54892	1.77875			1.53986	2.23248		1.7785	2.68909			1.79479	2.15833		1.82196	2.35273			1.66566	1.97881		1.63406	2.01394			1.82501	1.88008		1.73179	2.17054
	1.93975	2.02051		1.34435	2.02486			1.61046	1.91112		1.72766	2.11234			2.38935	1.69189		2.02933	2.41348			1.5777	1.71668		1.83564	1.90544			1.51023	1.82546		1.31708	1.64401
	1.94826	2.48588		1.24503	2.07878			1.44774	1.75975		2.02843	1.86231			1.45163	1.40394		1.45039	2.51021			1.71642	1.67254		1.75757	1.81311			1.61835	1.58826		1.35242	1.66217
	1.62391	2.26296		1.54289	1.1332			1.51036	1.89179		1.78564	1.75869			2.17142	1.37163		1.60742	2.11312			1.49148	1.56287		1.59508	2.27098			1.92481	1.74512		1.35405	1.94734
	1.34082	2.23334		1.53978	2.71818			1.33292	2.07478		1.97733	1.48378			1.40109	2.11097		1.52178	1.75988			1.61439	1.62364		1.55813	3.00698			1.6226	2.05215		1.63292	1.2909
	1.61288	2.08516		1.82989	2.0302			1.40629	1.92383		2.02076	2.02947			1.70739	1.35401		1.94011	1.89506			1.48185	1.27167		1.25361	1.84397			1.78233	1.65541		1.41467	1.63737
	1.94423	1.79817		2.22663	1.8882			1.67988	2.40554		1.93674	2.07355			1.83674	1.44295		1.83234	2.4709			1.77871	1.63464		1.60784	1.69475			1.67278	1.45124		1.65926	1.46173
	1.70747	2.65658		1.48243	2.14464			1.55936	1.90181		1.53215	2.34259			1.78002	1.84203		1.41157	2.36738			1.74141	1.81637		1.59379	2.33626			1.38233	1.53884		1.46876	1.70993
	1.36251	2.16675		1.45934	1.88432			1.34382	1.74278		1.77683	1.91603			1.44631	1.68531		1.72557	2.33682			1.56703	1.53852		2.00944	1.40203			1.43053	1.47702		1.95042	1.73927
	1.76511	1.68807		1.62152	2.03747			1.83967	2.24688		1.48653	1.82922			1.50056	1.78432		1.72026	2.01513			1.5298	2.23679		1.59694	1.59598			1.38768	1.45141		1.53326	2.14797
	1.41235	2.07556		1.46527	2.23611			1.67842	2.04079		1.40055	2.67286			1.89121	1.88312		1.69331	1.51541			1.67296	1.7481		1.33601	2.54271			1.37806	1.34558		1.37308	1.694
	1.67846	1.66189		1.39867	1.34542			1.53176	1.5076		1.59189	2.00854			1.7064	1.96516		1.48314	1.75615			1.98193	2.12838		1.44631	2.20298			1.85324	1.97442		1.59221	2.20226
	1.39549	2.05213		1.74541	1.55745			2.34301	1.43103		1.55132	2.00589			1.63568	1.82132		1.35321	2.03851			1.66671	1.99105		1.50798	2.61967			1.28422	1.74624		1.85528	1.84036
	1.85452	2.02377		1.69654	2.0925			1.32877	2.1949		1.38378	1.94072			1.39482	1.68132		1.93066	2.18513			2.16807	1.29076		1.54103	2.69657			1.57026	1.43012		1.78724	2.4891
	1.52125	2.39536		1.64472	1.73442			1.31554	2.32904		1.61636	2.00214			1.87349	1.81321		1.77282	2.00322			1.83912	2.02642		1.54266	1.95553			1.48514	1.42541		1.68579	2.24628
	1.62325	2.12257		2.13701	2.25132			1.73068	1.82935		1.73303	1.95321			1.35465	1.85312		2.05549	1.98321			1.6085	1.99512		1.6618	1.81462			1.77204	1.47682		1.96066	2.09603
	1.50325	2.26352		1.45283	2.15315			1.71624	1.93162		1.40973	2.00214			1.65323	1.97654		1.35829	1.68332			1.44333	1.63006		1.65476	1.9856			1.57421	1.73835		1.82102	1.91683
	2.03251	1.91652		1.57102	2.25321			1.64527	2.02356		1.81183	1.99532			1.45321	1.62325		1.45132	2.09453			1.65624	1.65851		1.59876	1.80469			1.73438	1.54412		1.55435	1.68654
	1.76526	2.02153		1.62513	2.00215			1.73023	1.84465		1.99811	2.00214			1.62513	1.68862		1.66813	2.00085			1.63124	1.66351		1.99793	1.90228			1.49997	1.6231		1.36522	1.77591
	1.71255	2.13266		1.54132	2.00012			1.81291	1.976		1.42135	2.05132			1.44456	1.78531		2.0335	2.19851			1.55213	1.68513		1.79199	1.55115			1.771	1.83547		1.98779	1.57735
	1.62542	1.91364		1.62521	1.98313			1.65632	1.44153		1.55123	1.9531			1.55632	1.99865		1.66823	2.01541			1.42132	1.66235		1.36828	1.97359			1.59586	1.61242		1.97985	2.11121
	1.93659	2.01265		1.89555	1.88857			1.59853	1.82316		1.35132	1.84321			1.45163	1.88532		1.35651	1.98523			1.38531	1.55513		1.38431	2.07512			1.56931	1.55077		1.55871	1.98513
	2.15633	2.45623		1.77549	2.01412			1.61156	2.18629		1.44835	2.55613			1.43651	1.72132		1.60213	1.93853			1.25132	1.45853		1.59557	2.0516			1.56787	1.54124		1.68976	1.85412
	1.57657	1.96526		1.69658	2.01151			1.63513	1.94663		1.55232	1.78531			1.62217	1.87853		1.65321	1.88556			1.64652	1.66532		1.70421	2.03849			1.54624	1.45851		1.42961	1.78513
	1.6866	2.22366		1.73653	1.98451			1.84511	1.92624		1.61032	2.55132			1.11213	2.35655		1.32215	2.02135			1.63324	1.35132		1.75194	2.31454			1.61942	1.44576		1.92531	1.98561
	1.64253	1.9237		1.89659	1.98543			1.95312	2.12479		1.44322	1.85132			1.42154	2.38553		1.69653	2.00005			1.55213	1.59532		1.37216	2.05385			1.2499	1.36589		1.54124	1.85412
	1.81255	2.01363		1.65656	2.00216			1.66351	2.65983		1.32132	1.93214			1.22513	2.24213		1.62321	1.82312			1.38544	1.33513		1.33852	1.93027			1.7747	1.54852		1.55224	1.75213
	1.84255	2.13652		1.72541	1.86596			1.54125	1.62625		2.03263	1.99659			1.45455	1.62625		1.78596	1.92367			1.55596	1.66266		1.66333	2.32626			1.33626	1.54886		1.63653	2.21215
	1.71257	2.1237		1.81237	2.36526			1.33652	1.44125		1.51226	2.96585			1.65653	2.51512		1.55262	2.05553			1.89556	1.99353		1.66326	1.78565			1.36326	1.55456		1.82127	1.74522
	1.5657	2.01363		1.42565	1.86525			1.41257	1.88746		1.5657	2.03263			1.41256	1.33262		1.55121	1.95327			1.62627	1.6266		1.33266	2.00363			2.21215	1.71845		2.12155	2.02127
	1.61257	2.2537		1.42544	1.81237			1.52367	1.5637		1.73657	2.56965			1.89889	1.33627		1.44627	2.01213			1.62624	1.65266		1.66266	1.62635			2.03261	1.62366		1.76558	2.22127
	1.62357	2.47522		1.68652	2.01237			2.21215	2.03135		1.5637	2.04699			1.82514	1.52155		1.88965	2.06263			1.55546	1.66336		1.62152	2.00322			1.55127	1.88966		1.77886	2.55451
	1.65265	2.09366		1.75327	1.8857			1.32326	1.77855		1.21215	2.33665			1.75214	1.66262		1.55413	2.01212			1.03999	1.36225		1.56563	1.7856			1.65237	1.93237		1.6263	2.22217
	1.1237	2.06364		1.40367	2.76959			1.51237	1.56524		1.77855	2.22537			1.42151	1.52154		1.66563	2.03266			1.22237	1.66235		1.66266	2.4457			1.55215	2.01266		1.55422	1.95956
	1.89567	2.22366		1.32517	2.12445			1.32327	1.23232		1.81265	2.02122			1.54513	1.8566		1.72555	2.21513			1.66233	1.56586		1.62656	1.75485			1.6326	1.56256		1.96635	2.22124
	1.33265	1.71255		2.12366	2.22366			1.51527	1.48524		1.46259	2.21214			1.41413	1.39549		1.81849	1.74851			1.55133	1.78596		1.54543	2.11126			1.74126	1.56986		1.51512	2.22127
	1.86597	2.17451		1.53326	2.12327			1.82366	1.55217		1.56597	2.03265			1.47476	2.01216		1.89659	2.03266			1.55663	1.7257		1.66264	2.45124			1.22636	1.71715		1.04569	3.22221
	1.69633	1.68652		1.63525	2.41216			1.51512	1.92366		1.71255	2.23652			1.92924	1.22123		1.30216	2.75652			1.62637	1.5547		1.46337	2.2237			1.45452	1.51512		1.75413	2.11236
	1.41254	2.09365		2.23634	2.13665			1.12114	1.46259		1.98565	2.78546			1.33626	1.67854		1.56599	2.62682			1.82637	1.66236		1.64534	2.11237			1.62625	1.61215		1.76599	2.12327
	1.52368	2.99365		2.01367	1.61223			1.51513	2.3266		1.88552	2.33627			2.22365	1.53627		1.52152	2.33666			1.62637	1.44126		1.66522	2.12125			2.33653	1.45453		1.71256	2.22365
	1.44633	1.88565		1.55631	1.66524			1.85446	2.01237		1.78486	2.32625			1.52233	1.77855		2.01217	2.36516			1.90327	1.45456		1.66523	2.21215			1.32327	1.41257		1.99632	1.96327
	1.48325	1.63251		1.56524	2.11123			2.01215	2.22155		1.44565	2.33237			1.66366	1.48566		1.99632	1.84212			1.62635	1.75463		1.55699	2.00002			1.33652	1.33266		1.54267	1.92366
	1.64326	2.33626		1.46586	2.61333			2.01215	1.96356		2.12155	2.03637			1.91366	1.55622		1.81814	2.33263			1.66524	1.54543		1.555	1.66524			1.22237	1.42421		1.65667	2.22152
	1.22355	3.12363		1.43663	2.11124			1.33325	2.22165		1.71256	2.00122			1.77895	1.56969		1.32327	2.07846			1.51223	1.66327		1.59653	2.44512			1.62366	2.01224		1.71546	2.16266
	1.59254	1.95425		1.63633	2.33266			1.72365	1.89633		1.41527	2.33265			1.99658	1.62366		1.52123	2.52262			2.01237	1.42126		1.59669	2.00333			1.11337	1.66524		1.84521	2.66266
	2.32522	1.94365		1.45215	2.05257			1.62366	2.36266		1.21215	2.06552			1.52652	1.86556		1.21233	1.96332			1.55214	1.99327		1.62659	2.11253			1.99669	1.55124		1.40327	2.66524
	1.45266	1.91325		1.76255	2.22124			1.6237	2.03137		1.48544	2.26354			1.66235	1.77846		1.66326	1.9626			1.44123	1.62658		1.54524	1.66235			1.66237	1.62623		1.89566	2.11233
	1.36252	2.21255		1.66369	1.77459			1.71214	1.81263		1.78546	2.21252			1.55212	1.77451		1.99332	2.22625			1.78565	1.66237		1.75125	2.22124			1.62356	2.54542		1.55633	2.02122
	1.48837	2.47855		1.26354	2.02152			1.42635	2.22137		1.55421	1.78522			1.71786	1.93686		1.41215	1.86623			1.77486	1.77856		1.65233	2.01233			1.23656	1.36255		1.53267	1.66626
	1.56526	2.08546		1.63252	2.41256			1.50327	1.63254		1.55426	1.73636			1.46463	1.59633		1.71855	1.75859			1.44537	1.11627		1.66986	2.22123			1.44124	1.33627		1.41267	2.6566
	1.90327	1.96358		1.33465	2.09899			1.24215	1.92524		1.63633	2.36965			1.91237	1.55654		1.82137	1.99923			1.5637	1.32626		1.78757	1.41236			1.55124	1.55127		1.71518	2.22166
	1.85655	1.90327		1.6637	2.21215			1.52126	1.73263		1.44521	2.32366			1.7746	1.96363		1.74556	1.88953			2.02626	1.85462		1.73562	1.62327			1.7789	1.58545		1.77544	2.2627
	1.55365	1.85365		1.52698	2.03625			1.43233	1.85336		1.91613	1.93636			1.99667	1.83263		1.62655	2.12165			1.66327	1.55456		1.88521	2.11527			1.9263	1.58856		1.44563	2.01249
	1.44363	2.02327		1.73665	2.04126			1.52124	1.93652		2.02263	1.88635			1.43537	1.59625		1.54552	1.72557			1.62626	1.70213		2.06224	1.72566			1.90963	1.58897		1.69653	2.11263
	1.33635	1.88635		1.35336	2.02125			1.66325	1.73625		1.22624	2.01254			1.66363	1.63266		1.53662	2.0557			1.36966	1.77127		2.07468	1.99665			1.66652	2.0525		1.23626	2.11237
	1.87545	1.95351		1.11363	1.71254			1.5363	1.77855		1.64225	2.06555			1.88635	1.38536		1.91227	1.62326			1.96334	1.77856		1.50177	2.22156			2.00332	2.08897		1.4557	1.87413
	1.69351	2.22125		1.64232	1.86352			1.63699	1.99855		1.55362	2.11527			1.46522	1.68997		1.45663	1.66262			1.66623	1.99364		1.64938	2.22652			1.62659	1.88863		1.74852	1.89318
	1.67254	2.01254		1.66352	1.82855			1.66252	1.72625		1.22125	2.15363			1.5567	1.81516		1.44456	1.82032			2.03327	1.72655		1.55985	2.44222			1.88222	2.22432		1.46232	2.36855
	1.86952	2.01125		1.65363	2.03523			1.55636	2.02623		1.40366	1.98969			1.87512	1.68523		2.02133	2.06266			1.66969	1.88622		1.49865	1.66326			1.85237	2.20627		1.88546	1.80431
	1.65365	2.54511		1.4367	2.01353			1.55537	1.73263		1.51257	2.15363			1.22337	1.59852		1.55222	2.06555			1.63659	1.79852		2.22549	1.42626			1.90522	2.05485		1.66266	2.11233
	1.67637	1.87551		1.46851	1.72652			1.59854	1.73263		1.53363	2.05213			1.23625	1.59852		1.44632	1.45322			1.6266	1.66399		2.55963	2.22152			1.63223	1.33266		1.44152	2.05122

## Sheet: Fig 1 d, e
Day 1		% of population							Day 10		% of population
NAR		Ctrl_0%	Ctrl_10%		Diff_0%	Diff_10%			NAR		Ctrl_0%	Ctrl_10%		Diff_0%	Diff_10%
1		0	0		0	0			1		1.4706	0		0	0
1.125		0	1.4706		2.0408	0			1.125		0	0		0	0
1.25		4.8387	0		2.0408	0			1.25		1.4706	1.4286		11.7647	2.9412
1.375		14.5161	1.4706		14.2857	0			1.375		17.6471	0		14.7059	11.7647
1.5		24.1935	2.9412		14.2857	0			1.5		20.5882	1.4286		13.2353	22.0588
1.625		24.1935	4.4118		28.5714	7.0175			1.625		17.6471	8.5714		22.0588	20.5882
1.75		16.129	10.2941		18.3673	3.5088			1.75		17.6471	11.4286		11.7647	16.1765
1.875		6.4516	13.2353		8.1633	17.5439			1.875		8.8235	14.2857		13.2353	11.7647
2		3.2258	23.5294		10.2041	22.807			2		11.7647	18.5714		7.3529	7.3529
2.125		3.2258	16.1765		2.0408	21.0526			2.125		2.9412	14.2857		4.4118	4.4118
2.25		3.2258	10.2941		0	12.2807			2.25		0	10		1.4706	1.4706
2.375		0	5.8824		0	5.2632			2.375		0	10		0	0
2.5		0	2.9412		0	5.2632			2.5		0	5.7143		0	1.4706
2.625		0	2.9412		0	1.7544			2.625		0	0		0	0
2.75		0	4.4118		0	0			2.75		0	2.8571		0	0
2.875		0	0		0	1.7544			2.875		0	0		0	0
3		0	0		0	0			3		0	0		0	0
3.125		0	0		0	1.7544			3.125		0	1.4286		0	0
3.25		0	0		0	0			3.25		0	0		0	0
3.375		0	0		0	0			3.375		0	0		0	0
3.5		0	0		0	0			3.5		0	0		0	0
