# Supplementary material for: Differentiation alters stem cell nuclear architecture, mechanics, and mechano-sensitivity
Source: eLife. 2016 Nov 30;5:e18207. doi: 10.7554/eLife.18207 (PMC5148611; doi:10.7554/eLife.18207)
Supplement: Figure 2—source data 1. — DOI: http://dx.doi.org/10.7554/eLife.18207.007 [file elife-18207-fig2-data1.xlsx]

## Sheet: Fig 2d
											Nomalization
	Ctrl					Diff					Ctrl					Diff
	Untreated	CYTOD	DMSO			Untreated	CYTOD	DMSO			Untreated	CYTOD	DMSO			Untreated	CYTOD	DMSO
	34210.8	31597.1	26454			45252.8	59669.7	60362.2			0.957781	0.884605	0.740617			1.26692	1.67054	1.68993
	36734.5	47146.2	26025.4			57845.2	62223.7	56693.9			1.02844	1.31993	0.728618			1.61946	1.74204	1.58723
	38319.5	38673.3	46865.5			47736.1	54973.6	60507.6			1.07281	1.08272	1.31207			1.33644	1.53907	1.694
	35110	25482.5	26710.3			58856.6	46296.5	61734.6			0.982956	0.713419	0.747793			1.64777	1.29614	1.72835
	51501.9	31187.9	36205.5			53556.7	59394.1	55162.7			1.44187	0.873151	1.01363			1.4994	1.66282	1.54436
	33393.9	39134.7	39944.8			60207.6	69511.6	63326.3			0.934912	1.09563	1.11831			1.6856	1.94608	1.77291
	32619.1	38231.3	29284.4			54360.1	53289	43577			0.913219	1.07034	0.81986			1.52189	1.4919	1.22
	29768.5	34448.2	32240.1			57753.7	57384.7	60494.2			0.833412	0.964428	0.902608			1.6169	1.60657	1.69362
	33379.7	35906.7	30898.8			58755.4	65423.9	51240.6			0.934512	1.00526	0.865057			1.64494	1.83164	1.43455
	32150.2	29512.2	37395.1			49985.7	54045	57025.8			0.90009	0.826236	1.04693			1.39942	1.51307	1.59652

## Sheet: Fig 2g
		Ctrl_0%		Ctrl_10%			Diff_0%		Diff_10%			Normalized NAR	Ctrl_0%		Ctrl_10%			Diff_0%		Diff_10%
		1.76199		2.58125			1.38277		1.48947				1.02567		1.50256			0.80492		0.867028
		1.61059		2.2433			1.53233		1.59889				0.937536		1.30584			0.891978		0.930723
		1.88181		1.73611			1.65087		1.79994				1.09541		1.0106			0.960984		1.04776
		1.9991		1.45881			1.87388		2.49142				1.16369		0.849179			1.0908		1.45027
		1.71351		1.9752			1.46097		1.63052				0.997443		1.14978			0.850437		0.949138
		2.21513		2.11216			2.05374		1.92096				1.28944		1.2295			1.19549		1.1182
		1.61863		1.71888			1.25385		1.52425				0.942215		1.00057			0.729874		0.887275
		1.48812		2.07995			1.72971		1.97997				0.866242		1.21075			1.00687		1.15255
		1.64409		1.99023			1.55919		1.39248				0.957034		1.15852			0.907614		0.81057
		1.48522		1.83293			1.5971		1.42931				0.864555		1.06696			0.92968		0.832013
		1.76194		2.41826			1.95395		1.48693				1.02564		1.40768			1.13741		0.86555
		1.81042		2.34162			1.49441		1.74666				1.05386		1.36307			0.869903		1.01674
		1.46689		2.18699			1.51073		1.87688				0.853886		1.27306			0.879405		1.09254
		1.56854		2.37704			1.68538		1.91882				0.913056		1.38369			0.981069		1.11696
		1.46526		2.1577			1.77212		1.78586				0.852937		1.25601			1.03156		1.03956
		1.75738		2.46853			1.82932		1.44798				1.02298		1.43695			1.06486		0.842877
		1.63635		2.55807			1.77779		1.89201				0.95253		1.48907			1.03486		1.10135
		1.41361		1.89746			1.60643		1.66713				0.822873		1.10452			0.935115		0.970447
		1.56725		2.25108			1.57053		1.24145				0.912304		1.31037			0.914217		0.722657
		2.17002		2.29077			1.23545		1.56579				1.26318		1.33347			0.719164		0.911458
		1.57389		1.88175			1.83055		2.08517				0.916172		1.09538			1.06558		1.21379
		1.50647		1.82379			1.95314		1.68988				0.876923		1.06164			1.13693		0.98369
		1.59165		2.80802			1.40565		1.55313				0.926511		1.63457			0.818239		0.904088
		1.79553		2.62241			2.06544		2.23743				1.04519		1.52652			1.2023		1.30242
		1.90588		2.09884			1.34804		2.24427				1.10942		1.22174			0.784705		1.3064
		1.41278		2.63911			1.51382		2.14979				0.822386		1.53624			0.881207		1.2514
		2.14412		3.31828			1.68884		1.98295				1.24811		1.93159			0.983086		1.15429
		2.17075		2.61156			1.87591		1.56741				1.26361		1.52021			1.09198		0.912401
		1.54905		2.28092			1.52538		1.96665				0.901714		1.32774			0.887933		1.1448
		1.76409		2.18637			1.85987		2.15111				1.02689		1.2727			1.08264		1.25217
		1.58123		2.03794			2.01789		1.77661				0.920445		1.1863			1.17463		1.03418
		1.63892		1.92589			1.80002		1.66823				0.954023		1.12107			1.0478		0.971087
		1.53427		2.36397			1.61114		1.64823				0.893108		1.37608			0.937852		0.959445
		1.89432		2.09204			1.98974		1.58532				1.1027		1.21779			1.15824		0.922825
		1.53147		2.01526			1.92888		1.43685				0.891477		1.1731			1.12281		0.836401
		1.6263		1.62655			1.71171		1.58632				0.946681		0.946824			0.996399		0.923407
		1.47998		2.20273			1.963		1.86523				0.861505		1.28222			1.14268		1.08576
		2.38606		1.81875			1.74914		1.95251				1.38894		1.05871			1.01819		1.13657
		1.80395		2.02109			1.60777		1.98553				1.05009		1.17649			0.935895		1.15579
		1.66585		2.22152			1.99952		2.11225				0.969704		1.29316			1.16393		1.22955
		1.55455		2.66266			1.45213		1.55217				0.904912		1.54995			0.845295		0.903526
		1.66565		2.66235			1.55522		1.66327				0.969587		1.54977			0.905304		0.968197
		1.85659		1.78853			1.62659		1.88485				1.08073		1.04112			0.946845		1.09718
		2.00327		1.66266			1.99855		2.22522				1.16611		0.967844			1.16337		1.29531
		1.88522		2.22125			1.55653		1.666				1.0974		1.29301			0.906067		0.969788
		2.12125		2.22333			2.33263		2.01215				1.23479		1.29421			1.35784		1.17129
		1.77453		1.88786			1.22327		1.77849				1.03296		1.09893			0.71207		1.03527
		1.33266		2.11221			1.77486		1.99899				0.775749		1.22953			1.03315		1.16362
		1.55453		2.12124			1.55666		1.45456				0.904899		1.23478			0.906138		0.84671
		1.55555		2.00122			1.62627		1.54855				0.905493		1.16492			0.946659		0.901423
