# Supplementary material for: Differentiation alters stem cell nuclear architecture, mechanics, and mechano-sensitivity
Source: eLife. 2016 Nov 30;5:e18207. doi: 10.7554/eLife.18207 (PMC5148611; doi:10.7554/eLife.18207)
Supplement: Figure 3—source data 1. — DOI: http://dx.doi.org/10.7554/eLife.18207.010 [file elife-18207-fig3-data1.xlsx]

## Sheet: Fig 3b
DAY 1									DAY 3									DAY 7									DAY 10
Ctrl				Diff					Ctrl				Diff					Ctrl				Diff					Ctrl				Diff
DAPI	LMAC	Ratio		DAPI	LMAC	Ratio			DAPI	LMAC	Ratio		DAPI	LMAC	Ratio			DAPI	LMAC	Ratio		DAPI	LMAC	Ratio			DAPI	LMAC	Ratio		DAPI	LMAC	Ratio
802.735	430.267	0.536001		765.531	320.985	0.419297			801.513	330.267	0.412054		939.232	592.621	0.630963			1410.68	680.131	0.48213		557.874	286.337	0.513264			1410.68	680.131	0.48213		1373.21	226.094	0.164646
825.542	361.348	0.437709		810.655	371.832	0.458681			823.513	380.853	0.462474		760.263	300.517	0.39528			423.655	302.326	0.713614		551.532	286.363	0.519213			1420.52	715.627	0.503779		929.423	220.986	0.237766
752.704	319.955	0.425075		1777.52	568.832	0.320014			852.523	320.253	0.375653		1241.4	709.655	0.571657			1278.93	427.052	0.333913		570.941	243.249	0.426048			1278.93	427.052	0.333913		881.154	257.178	0.291865
820.992	307.801	0.374914		685.321	248.832	0.363088			785.353	310.832	0.395786		915.519	398.998	0.435816			1748.18	525.542	0.300622		570.954	232.625	0.407432			1748.18	525.542	0.300622		626.321	232.42	0.371087
1888.23	764.692	0.404978		657.358	387.532	0.58953			1782.2	780.579	0.437985		983.83	395.193	0.401688			1758.52	454.626	0.258528		630.803	308.457	0.48899			788.547	465.682	0.590557		824	256.781	0.311628
621.851	437.513	0.703565		1155.65	482.583	0.417585			655.203	737.513	1.12562		729.603	267.422	0.366531			1756.63	515.626	0.293532		523.035	336.312	0.643			777.627	458.964	0.590211		660.522	257.806	0.390306
681.351	366.05	0.537242		1188.52	471.583	0.396781			782.353	380.853	0.486805		683.035	243.793	0.356926			711.82	439.83	0.617895		458.137	167.697	0.366042			711.82	439.83	0.617895		814.145	320.059	0.393122
1189.3	559.86	0.470749		569.585	268.856	0.472021			1175.53	560.275	0.476614		983.83	395.193	0.401688			722.852	445.626	0.616484		582.031	130.015	0.223382			727.552	422.623	0.580884		557.853	230.832	0.413786
1288.52	531.647	0.412602		765.531	320.985	0.419297			1354.25	553.845	0.408967		915.515	398.998	0.435818			695.563	350.925	0.50452		622.256	192.498	0.309356			695.563	350.925	0.50452		570.515	110.569	0.193805
579.632	254.751	0.439505		485.525	225.165	0.463756			600.254	255.326	0.425363		655.481	245.028	0.373814			413	309.748	0.749993		567.625	240.528	0.423744			413	309.748	0.749993		528.865	120.855	0.228518
1118.22	568.816	0.508682		589.358	264.532	0.448848			1120.53	570.883	0.509478		856.866	424.316	0.495195			1138.41	533.712	0.468823		605.692	243.266	0.401634			1138.41	533.712	0.468823		628.864	210.552	0.334814
515.513	215.135	0.417322		999.585	316.254	0.316385			535.214	220.355	0.411715		725.785	247.527	0.341047			696.496	299.389	0.42985		769.064	250.425	0.325624			696.496	299.389	0.42985		559.832	110.235	0.196908
579.62	254.751	0.439514		755.553	381.522	0.504957			556.223	265.742	0.477762		850.812	575.41	0.676307			719.303	490.576	0.682016		629.54	159.622	0.253554			719.303	490.576	0.682016		843.853	285.664	0.338523
1002.35	406.263	0.40531		633.823	295.523	0.466255			1010.24	405.253	0.401147		856.861	320.286	0.373789			725.353	400.962	0.552783		558.35	141.164	0.252824			725.353	400.962	0.552783		596.824	100.553	0.168481
852.254	481.334	0.564777		482.532	278.383	0.576922			835.235	490.255	0.586966		763.541	288.771	0.3782			681.482	441.518	0.64788		598.424	149.553	0.249912			681.482	441.518	0.64788		667.865	110.554	0.165533
633.521	285.84	0.451193		521.585	254.853	0.488613			633.532	285.84	0.451185		764.501	323.638	0.423332			746.678	403.975	0.54103		588.061	210.998	0.358802			746.678	403.975	0.54103		573.832	115.853	0.201894
457.676	268.737	0.587177		552.583	213.822	0.38695			4365.25	288.853	0.0661711		635.523	218.003	0.343028			1080.56	591.675	0.547566		692.182	299.118	0.432138			1080.56	591.675	0.547566		578.953	120.832	0.208708
528.644	244.754	0.462985		485.532	235.282	0.484587			538.523	320.554	0.595247		935.532	492.523	0.526463			573.599	347.716	0.6062		676.1	281.3	0.416063			573.599	347.716	0.6062		623.856	210.385	0.337234
562.803	413.814	0.735273		504.953	226.383	0.448325			566.251	500.352	0.883621		939.523	582.532	0.620029			496.141	329.536	0.664198		574.389	177.727	0.309418			496.141	329.536	0.664198		929.864	220.586	0.237224
552.581	231.487	0.41892		521.353	248.553	0.476746			553.251	300.533	0.543212		760.264	300.832	0.395695			602.951	340.57	0.564839		553.04	225.719	0.408142			602.951	340.57	0.564839		888.832	117.886	0.13263
485.548	203.612	0.419345		447.153	202.695	0.453302			485.251	150.285	0.309706		729.608	302.852	0.415089			625.025	248.674	0.397863		618.097	204.618	0.331045			625.025	248.674	0.397863		583.853	110.286	0.188894
504.093	238.303	0.472737		417.853	231.31	0.553568			502.235	238.532	0.474941		854.783	434.832	0.508705			746.678	403.975	0.54103		555.832	122.523	0.220432			746.678	403.975	0.54103		618.856	444.859	0.71884
521.308	301.644	0.578629		494.583	228.985	0.462986			555.524	202.855	0.365161		882.513	422.853	0.479147			1100.56	591.675	0.537614		563.852	121.535	0.215544			1100.56	591.675	0.537614		444.853	122.366	0.275071
457.172	231.313	0.505964		850.82	575.231	0.67609			468.255	232.532	0.496593		748.651	312.853	0.417889			725.035	274.385	0.378444		447.886	100.883	0.225243			725.035	274.385	0.378444		853.832	218.866	0.256333
420.912	228.06	0.541823		755.523	430.582	0.569913			430.253	235.654	0.547711		846.965	422.853	0.499257			667.321	268.674	0.402616		745.89	131.239	0.175949			667.321	268.674	0.402616		557.255	111.232	0.199608
504.673	330.523	0.654926		755.551	432.552	0.572499			511.255	332.253	0.649877		685.9	222.853	0.324906			752.656	326.455	0.433737		543.533	115.253	0.212044			1152.22	555.551	0.482159		448.265	180.857	0.403459
802.563	558.532	0.695935		758.254	322.585	0.425432			566.253	338.835	0.598381		778.985	222.532	0.285669			888.623	454.627	0.511608		666.985	122.353	0.183442			722.614	268.512	0.371584		666.898	111.686	0.167471
482.533	278.632	0.577437		652.532	352.553	0.540285			959.355	592.863	0.617981		555.935	222.885	0.40092			787.627	555.455	0.705226		448.865	80.5651	0.179486			665.551	323.625	0.486251		888.266	120.854	0.136056
417.832	231.583	0.554249		662.553	335.256	0.506007			860.353	575.405	0.668801		968.567	323.832	0.334342			626.365	212.327	0.338983		552.255	102.513	0.185627			656.553	333.655	0.508192		581.953	180.982	0.310991
865.632	542.656	0.62689		855.553	555.585	0.649387			925.326	500.532	0.540925		545.856	245.864	0.450418			777.517	363.215	0.467148		235.832	101.251	0.429336			666.514	323.551	0.485438		498.899	120.389	0.241309

## Sheet: Fig 3d
		A-type Lamin	β-actin	Ratio					A-type Lamin	β-actin	Ratio
1st	Ctrl	13659.1	22101.5	0.618017			1st	Diff	19805.4	14541.2	1.36202
	Ctrl	10165.5	15319	0.663588				Diff	14006.2	14802.5	0.946206
	Ctrl	4041.35	20828.1	0.194033				Diff	14974.2	16357	0.915463
2nd	Ctrl	3220.36	8858.02	0.363552			2nd	Diff	5693.81	8771.51	0.649126
	Ctrl	4614.18	8538.07	0.540425				Diff	9722.9	8003.77	1.21479
	Ctrl	3820.18	8804.08	0.433911				Diff	8123.34	9735.71	0.834386

## Sheet: Fig 3f
	DAY 1					DAY 7				Nomalization		DAY 1					DAY 7
	Ctrl	Diff				Ctrl	Diff					Ctrl	Diff				Ctrl	Diff
	24.62	23.55				25.45	39.18					0.855336	0.818163				0.884172	1.36117
	18.22	25.15				17.92	26.23					0.632991	0.873749				0.622568	0.91127
	22.32	35.66				21.77	47.76					0.775431	1.23888				0.756323	1.65926
	26.44	35.45				25.93	58.05					0.918566	1.23159				0.900848	2.01675
	27.62	25.66				28.64	52.44					0.959561	0.891467				0.994997	1.82185
	33.11	23.22				32.79	37.86					1.15029	0.806698				1.13917	1.31531
	41.23	26.21				40.41	37.69					1.43239	0.910575				1.4039	1.30941
	22.32	35.24				21.06	50.22					0.775431	1.22429				0.731656	1.74472
	26.23	38.21				25.18	46.59					0.91127	1.32747				0.874792	1.61861
	24.33	44.21				23.67	42.42					0.845261	1.53592				0.822332	1.47374
	31.21	25.22				30.29	56.5					1.08428	0.876181				1.05232	1.9629
	20.33	33.33				19.54	57.72					0.706295	1.15793				0.678849	2.00528
	28.32	25.55				30.06	48.42					0.98388	0.887646				1.04433	1.68218
	33.66	24.66				32.87	58.09					1.1694	0.856726				1.14195	2.01814
	42.51	26.23				40.21	58.13					1.47686	0.91127				1.39696	2.01952
	44.51	24.62				42.57	26.2					1.54635	0.855336				1.47895	0.910228
	28.65	27.66				27.45	26.2					0.995345	0.960951				0.953655	0.910228
	33.25	24.33				30.61	40.06					1.15516	0.845261				1.06344	1.39175
	25.22	24.21				23.76	32.73					0.876181	0.841092				0.825459	1.13709
	22.11	23.11				21.41	49.36					0.768135	0.802877				0.743816	1.71484
	24.62	25.23				23.33	63.23					0.855336	0.876529				0.81052	2.19671
	33.23	27.26				21.59	39.54					1.15446	0.947054				0.750069	1.37368
	38.21	13.22				28.36	31.33					1.32747	0.459283				0.98527	1.08845
	25.22	18.24				27.35	48.26					0.876181	0.633685				0.950181	1.67663
	22.11	23.11				27.36	66.51					0.768135	0.802877				0.950528	2.31066
