# Supplementary material for: Differentiation alters stem cell nuclear architecture, mechanics, and mechano-sensitivity
Source: eLife. 2016 Nov 30;5:e18207. doi: 10.7554/eLife.18207 (PMC5148611; doi:10.7554/eLife.18207)
Supplement: Figure 4—source data 1. — DOI: http://dx.doi.org/10.7554/eLife.18207.014 [file elife-18207-fig4-data1.xlsx]

## Sheet: Fig 4b
	Ctrl					Diff				TSA
	0	0.03	0.09	0.15		0.03	0.09	0.15		0.03	0.09	0.15
	1.56561	0.745097	1.35228	1.20703		1.24439	0.754599	0.853957		1.23007	1.34508	0.937708
	1.18493	0.629322	1.09374	0.96077		1.07611	0.879549	1.00948		1.06005	1.25847	1.14424
	1.05526	0.846326	1.58359	1.09522		0.964321	0.919066	0.937806		0.917156	1.4916	1.10185
	0.92217	1.25987	1.54429	1.38798		0.777305	1.10777	1.41601		0.853589	1.54232	1.75645
	1.00753	1.21524	1.32187	1.16133		0.885803	0.923583	0.921963		1.07079	1.1291	1.07967
	0.98057	0.8869	1.44183	0.949647		1.10196	0.928114	1.03382		1.16027	1.03375	1.19656
	1.19174	1.0348	1.22828	1.27605		0.875463	1.36218	1.09977		0.939768	1.32518	1.24383
	1.14675	1.50161	1.22667	1.58823		0.984833	1.16527	0.782854		1.01528	1.17318	1.13819
	1.19734	0.734194	1.31272	1.28111		1.1667	0.995989	0.736087		1.21162	1.08502	1.00981
	0.919298	1.22739	1.11776	1.055		0.891645	0.753666	0.872477		0.829378	0.774129	0.857335
	1.11642	1.37845	1.18773	1.29877		1.15255	0.866813	1.06905		0.93345	0.983197	1.68485
	1.21198	0.810843	0.917851	1.37869		1.02493	1.36099	0.992128		0.98091	1.35968	1.10925
	0.72988	1.13173	1.07474	1.17727		0.905342	0.934268	0.847477		0.810835	0.841177	0.899173
	0.880627	1.02071	1.1942	1.51216		1.12572	1.11775	0.8859		0.787252	1.07075	0.870525
	0.785006	0.977201	0.986568	1.27587		1.17647	1.12852	0.902027		0.94989	0.990746	1.154
	0.721249	0.889408	0.868413	1.26519		0.855116	1.00019	1.09611		0.856624	1.0528	1.07709
	0.992915	1.4334	1.24623	1.3958		1.2569	1.36714	1.45498		0.88516	1.18895	1.16133
	1.45436	1.50191	1.08171	1.4058		0.907019	1.0197	0.97172		0.866174	1.00313	0.954856
	0.919631	1.14979	1.06225	1.31371		0.920852	0.999679	0.940963		0.849676	1.03408	0.924633
	0.838502	1.28261	1.57996	1.20895		1.402	1.45206	1.15331		0.89447	0.784949	1.13329
	1.03457	1.00743	0.973062	1.32306		0.975697	0.942119	1.10026		1.11697	1.0069	1.08117
	0.807293	0.951384	0.725002	1.38739		0.935614	0.916938	1.1504		1.08746	0.816573	1.13044
	1.20816	1.22051	1.11147	1.2403		0.940559	1.07878	0.894724		1.24341	0.961107	0.99174
	0.867265	1.22952	1.05535	1.43328		0.98848	0.822251	1.1516		1.15073	1.01521	1.22897
	0.760149	1.11652	1.25725	1.31248		1.61523	0.864136	0.948926		1.23923	0.930002	1.21323
	1.01033	0.800038	0.885482	1.5025		0.799853	1.33983	1.16798		1.16329	1.17664	1.14771
	0.777816	0.920456	0.832677	0.659493		0.974212	1.13623	1.10115		1.10606	1.00089	1.28528
	0.712642	0.857148	1.02354	1.15037		0.593981	1.09706	1.02184		1.47694	1.01864	1.23697

## Sheet: Fig 4d, e
<AGG>
Ctrl			Diff			Diff/TSA
0	0.1		0	0.1		0	0.1
0.951474	1.54313		1.99895	3.08486		1.22377	1.89133
0.715132	1.00473		2.13843	6.70773		2.23235	2.97896
1.3334	1.35955		1.26486	5.08836		0.877491	1.4395
<COLII>
Ctrl			Diff			Diff/TSA
0	0.1		0	0.1		0	0.1
0.95009	0.378796		4.07933	10.1861		4.67142	1.71528
1.27592	0.254168		3.08789	24.1864		1.50296	2.8887
0.773957	0.0490005		8.27866	5.47354		3.14427	0.350279
