# Supplementary material for: Differentiation alters stem cell nuclear architecture, mechanics, and mechano-sensitivity
Source: eLife. 2016 Nov 30;5:e18207. doi: 10.7554/eLife.18207 (PMC5148611; doi:10.7554/eLife.18207)
Supplement: Figure 5—source data 1. — DOI: http://dx.doi.org/10.7554/eLife.18207.018 [file elife-18207-fig5-data1.xlsx]

## Sheet: Fig 5h
0					0.1
DL	Diff	Ctrl			DL	Diff	Ctrl
1.7422	1.14874	1.46567			1.9318	1.84574	2.0405
1.76603	1.29164	1.78793			1.41653	1.54685	2.69395
1.65585	1.45604	1.92058			2.29064	1.52956	2.28993
1.40168	1.38357	1.55719			1.82285	1.54729	2.08801
1.47512	1.93807	1.13551			1.89284	1.60059	1.55646
2.02212	1.81943	1.94134			1.84255	1.5594	1.74921
1.85328	1.45147	2.08257			2.45109	1.43258	1.59089
1.55191	1.45078	1.35037			1.51583	1.5612	2.00201
1.24711	1.74857	1.46416			1.88451	1.15518	1.7617
2.13674	1.63359	1.77			1.80397	1.14824	1.56792
1.65418	1.40733	1.58712			1.88295	1.23819	2.07867
1.31389	1.47182	1.37969			1.57431	2.09872	1.31521
1.35899	1.31632	2.08854			1.85092	1.215	2.37268
1.26932	1.53391	1.45334			1.81393	1.68161	2.06137
1.68732	1.40068	1.50002			1.48333	1.82161	2.08968
1.32547	1.36473	1.9545			1.63851	1.756	2.92363
1.68137	1.6132	1.63841			1.72494	1.54009	1.78395
1.40957	1.34284	1.43132			1.87359	1.3238	2.0816
1.907	1.41416	1.88393			1.76657	2.12159	1.8045
1.88665	2.0124	1.63967			1.53089	1.33079	2.13643
1.7849	1.565	1.65961			1.72436	1.85422	2.00986
1.36854	1.75103	1.93278			1.50346	1.36956	2.0509
1.42882	1.45655	1.84548			1.1098	1.74416	1.57013
1.81453	1.761	1.99484			1.58907	1.74245	1.97893
2.02556	1.58505	1.32897			1.67277	1.69962	2.08504
1.67656	1.43845	1.22933			1.93548	1.42625	1.81053
1.69827	1.86397	1.7514			1.81289	1.48175	2.04666
1.62899	1.62304	1.7878			1.73874	1.93456	2.06589
1.77994	2.03474	1.8312			1.7455	1.58501	2.04293
1.414	1.66259	1.95923			1.7505	1.8406	2.69711
1.23515	1.76525	1.55255			1.99551	1.22165	1.84652
2.22512	1.65854	1.78588			1.96545	1.21355	1.62352
1.62549	1.51255	1.62636			1.62665	1.33214	2.13225
1.29355	1.50325	1.35356			1.65659	2.15499	1.42154
1.36353	1.35363	2.02325			1.95656	1.33265	2.45658
1.32326	1.66525	1.55251			1.95957	1.72565	2.04532
1.69655	1.52152	1.62626			1.55252	1.99513	2.12165
1.33266	1.55124	2.01252			1.73627	1.8266	3.02135
1.62587	1.6366	1.73237			1.75327	1.62366	1.87898
1.52366	1.36366	1.45659			1.95955	1.34562	2.12313
1.91353	1.43627	1.89896			1.78547	2.22135	1.98523
1.8857	2.22526	1.65659			1.65653	1.43547	2.23166
1.79859	1.55636	1.65686			1.63528	1.95469	2.2136
1.37257	1.76366	2.06585			1.62625	1.42616	2.32157
1.43257	1.56564	1.84856			1.23237	1.32625	1.64585
1.82366	1.88487	2.01246			1.62547	1.82547	2.62147
2.01214	1.62625	1.62549			1.64855	1.42568	2.13469
1.68353	1.65652	1.22153			2.03265	1.99865	1.9858
1.70722	2.12325	1.76586			1.96654	1.84658	2.13482
1.63635	1.66569	1.78555			1.82326	2.10217	2.13852
1.78566	2.32327	1.85363			1.8265	1.62565	2.12325
1.25129	1.68966	1.22528			1.75895	2.01235	2.53217

## Sheet: Fig 5i
								Normalized
	Ctrl		Diff		DL			Ctrl		Diff		DL
	41087.8		48776.1		50817			1.0768		1.2783		1.33178
	35976.5		75588.5		51541.9			0.942851		1.98098		1.35078
	39391.8		71724.4		41304.6			1.03236		1.87971		1.08249
	38879.2		61921.6		51304.4			1.01892		1.6228		1.34456
	30280.3		37766.1		49947.2			0.793568		0.989752		1.30899
	39679.7		61945.9		48658.9			1.0399		1.62344		1.27522
	42266		60209.3		39631.4			1.10768		1.57793		1.03864
	27840.6		62799.4		47226.8			0.729631		1.64581		1.23769
	38288.4		62316.1		45931.6			1.00344		1.63315		1.20375
	47881.1		57122.5		46581.4			1.25484		1.49703		1.22078

## Sheet: Fig 5j,k
	<AGG expression>
	Ctrl		Diff		DL
	0.575152		3.28777		15.4539
	0.460903		3.74436		7.26299
	0.939964		2.90924		8.60547
	0.744414		2.45652		5.24675
	0.814391		1.14611		6.91006
Mean	0.706965		2.7088		8.69583
SD	0.190494		0.994161		3.96287
	<TGFβ expression>
	Ctrl		Diff		DL
	0.611083		1.17409		2.42839
	0.46063		1.49808		1.84465
	0.65422		0.74154		1.45689
	0.577493		0.749656		1.8078
	0.357216		0.488079		2.45666
Mean	0.532128		0.930289		1.99888
SD	0.121351		0.401756		0.432461
