# Supplementary material for: Differentiation alters stem cell nuclear architecture, mechanics, and mechano-sensitivity
Source: eLife. 2016 Nov 30;5:e18207. doi: 10.7554/eLife.18207 (PMC5148611; doi:10.7554/eLife.18207)
Supplement: Figure 6—source data 1. — DOI: http://dx.doi.org/10.7554/eLife.18207.021 [file elife-18207-fig6-data1.xlsx]

## Sheet: Fig 6c
Day 1				Day 3				Day 5				Normalization		Day 1				Day 3				Day 5
Ctrl	Diff	DL		Ctrl	Diff	DL		Ctrl	Diff	DL				Ctrl	Diff	DL		Ctrl	Diff	DL		Ctrl	Diff	DL
25.51	22.52	38.23		23.26	15.62	50.66		20.31	34.55	42.51				1.09704	0.968459	1.64406		1.00028	0.671729	2.1786		0.87342	1.4858	1.82812
20.32	21.62	48.22		31.62	24.68	48.94		22.62	30.31	32.62				0.87385	0.929755	2.07367		1.3598	1.06135	2.10464		0.97276	1.30346	1.4028
15.32	27.22	24.32		25.21	48.26	33.62		21.32	58.62	55.26				0.658828	1.17058	1.04587		1.08414	2.07539	1.44581		0.916854	2.52092	2.37642
18.22	21.33	32.33		20.33	32.62	41.52		25.64	35.62	30.51				0.78354	0.917284	1.39033		0.87428	1.4028	1.78554		1.10263	1.53182	1.31206
15.32	22.1	45.62		22.51	25.64	48.62		26.84	28.65	55.62				0.658828	0.950397	1.96186		0.968029	1.10263	2.09087		1.15424	1.23208	2.39191
21.32	18.22	32.33		28.22	36.97	34.64		21.54	33.32	78.62				0.916854	0.78354	1.39033		1.21358	1.58987	1.48967		0.926315	1.43291	3.38101
23.33	18.22	55.32		26.62	26.22	55.21		29.36	38.62	45.62				1.00329	0.78354	2.379		1.14478	1.12758	2.37427		1.26261	1.66083	1.96186
18.32	20.26	26.33		21.65	27.92	28.81		20.17	32.15	33.33				0.787841	0.871269	1.13231		0.931045	1.20068	1.23896		0.867399	1.38259	1.43334
21.33	26.54	55.22		24.54	38.62	42.62		24.51	32.22	21.51				0.917284	1.14134	2.3747		1.05533	1.66083	1.83285		1.05404	1.3856	0.925025
22.32	21.33	44.52		18.62	19.64	28.66		28.64	27.62	24.32				0.959858	0.917284	1.91456		0.800742	0.844607	1.23251		1.23165	1.18778	1.04587
30.33	25.22	51.33		19.54	38.45	45.62		21.14	33.16	29.62				1.30432	1.08457	2.20742		0.840306	1.65352	1.96186		0.909113	1.42603	1.27379
31.33	28.22	25.65		21.51	20.17	57.62		29.54	42.11	60.66				1.34733	1.21358	1.10306		0.925025	0.867399	2.47791		1.27035	1.81092	2.60865
32.12	29.33	32.22		32.66	22.15	66.62		15.51	42.13	80.62				1.3813	1.26132	1.3856		1.40452	0.952548	2.86495		0.666998	1.81178	3.46702
20.23	32.23	28.95		28.62	28.32	Da		38.22	30.33	55.32				0.869979	1.38603	1.24498		1.23079	1.21788	1.81565		1.64363	1.30432	2.379
25.22	25.21	50.65		24.47	31.35	31.62		29.33	35.22	50.13				1.08457	1.08414	2.17817		1.05232	1.34819	1.3598		1.26132	1.51462	2.15581
21.32	25.33	54.66		25.62	17.9	40.62		20.45	35.62	55.42				0.916854	1.0893	2.35062		1.10177	0.769779	1.74684		0.87944	1.53182	2.3833
25.66	28.32	29.32		28.94	35.62	55.64		22.54	30.13	40.62				1.10349	1.21788	1.26089		1.24455	1.53182	2.39277		0.969319	1.29572	1.74684
28.65	26.32	55.48		24.15	30.66	22.64		28.62	36.23	60.52				1.23208	1.13188	2.38588		1.03856	1.31852	0.97362		1.23079	1.55805	2.60263
26.32	24.51	58.62		26.48	31.35	61.22		28.66	65.56	55.46				1.13188	1.05404	2.52092		1.13876	1.34819	2.63273		1.23251	2.81937	2.38502
22.13	29.33	62.48		30.13	36.18	56.92		35.61	34.62	60.66				0.951688	1.26132	2.68692		1.29572	1.5559	2.44781		1.53139	1.48881	2.60865
25.21	22.55	38.22		25.66	15.62	51.55		21.22	34.55	43.55				1.08414	0.969749	1.64363		1.10349	0.671729	2.21688		0.912554	1.4858	1.87284
21.22	22.22	48.15		32.62	25.66	48.95		23.52	32.12	35.62				0.912554	0.955558	2.07066		1.4028	1.10349	2.10507		1.01146	1.3813	1.53182
16.22	27.33	25.12		26.55	48.21	34.66		22.41	60.12	56.51				0.697532	1.17531	1.08027		1.14177	2.07324	1.49053		0.963729	2.58543	2.43018
20.11	22.12	30.32		21.55	33.51	41.51		26.55	34.55	32.41				0.864819	0.951258	1.30389		0.926745	1.44108	1.78511		1.14177	1.4858	1.39377
15.62	23.12	45.15		22.51	26.14	48.22		25.54	29.51	56.54				0.671729	0.994262	1.94165		0.968029	1.12414	2.07367		1.09833	1.26906	2.43147
22.33	20.13	30.45		29.32	37.62	35.44		22.46	35.55	80.12				0.960288	0.865679	1.30948		1.26089	1.61783	1.52408		0.965879	1.52881	3.44551
24.22	18.22	58.51		28.44	27.44	56.12		30.33	39.51	58.12				1.04157	0.78354	2.51619		1.22305	1.18004	2.41341		1.30432	1.6991	2.49942
20.11	21.12	28.55		22.54	28.21	32.44		21.51	32.14	35.55				0.864819	0.908253	1.22778		0.969319	1.21315	1.39506		0.925025	1.38216	1.52881
22.11	27.21	57.51		26.62	39.32	42.15		25.21	31.11	22.15				0.950827	1.17015	2.47318		1.14478	1.69093	1.81264		1.08414	1.33787	0.952548
23.21	22.51	52.51		19.32	19.44	28.95		29.44	30.41	25.41				0.998132	0.968029	2.25816		0.830845	0.836006	1.24498		1.26605	1.30776	1.09274
29.33	26.21	55.64		20.22	38.15	46.66		22.14	34.54	30.12				1.26132	1.12715	2.39277		0.869549	1.64062	2.00659		0.952118	1.48537	1.29529
30.01	29.32	37.11		22.33	20.17	52.55		29.54	45.14	62.11				1.29056	1.26089	1.59589		0.960288	0.867399	2.25988		1.27035	1.94122	2.671
30.21	30.12	40.65		32.11	22.13	62.99		15.66	50.12	80.12				1.29916	1.29529	1.74813		1.38087	0.951688	2.70885		0.673449	2.15538	3.44551
24.23	33.21	35.44		25.32	27.54	51.44		37.51	30.12	53.45				1.042	1.42818	1.52408		1.08887	1.18434	2.21215		1.6131	1.29529	2.29859
25.11	24.12	55.46		23.11	32.34	41.66		30.12	35.11	57.66				1.07984	1.03727	2.38502		0.993832	1.39076	1.79156		1.29529	1.50988	2.47963

## Sheet: Fig 6d
LMAC expression
		Day 1				Day 3				Day 5
		Ctrl	Diff	DL		Ctrl	Diff	DL		Ctrl	Diff	DL
		0.793067	0.596769	1.34197		0.498161	0.716835	0.78531		0.560331	0.742259	1.13617
		0.515698	0.709483	1.10479		0.383198	0.437857	1.21141		0.532451	0.577858	1.37925
		0.422347	0.901019	0.607848		0.482245	0.415799	1.60669		0.529519	0.432487	1.66778

## Sheet: Fig 6f
CCP(%)
	DAY 1							DAY 3							DAY5
	Ctrl		Diff		DL			Ctrl		Diff		DL			Ctrl		Diff		DL
	6.9378		6.42143		11.4947			7.36743		4.13732		17.9747			6.45406		9.08656		13.1565
	4.70455		3.01974		9.03832			7.40482		6.4257		16.151			5.85366		7.78647		21.1089
	7.60456		10.0697		7.30929			5.27544		7.75764		18.4173			6.6313		7.76639		15.2047
	6.4695		5.30365		5.71859			6.71717		10.7322		17.6374			3.61174		8.95852		17.6502
	3.73479		2.55734		7.44316			6.57546		11.1272		19.6225			6.79916		9.15888		17.6371
	6.48276		3.78058		12.8074			5.6809		6.85969		18.6939			6.16706		5.05822		15.8338
	6.02751		9.47867		7.30848			7.0723		5.53377		16.0685			4.94281		9.19481		15.6098
	2.16431		5.53857		8.29187			7.82374		9.20751		15.7191			6.91676		4.50715		13.96
	3.88263		4.85821		9.54787			4.87351		8.02676		14.8559			2.87864		12.1311		12.7052
	3.9137		4.28875		6.94901			3.36455		9.23077		15.5381			4.27136		8.47101		10.4084
	3.83363		4.61002		9.65517			8.11162		8.1298		15.8486			8.32988		8.20789		15.8066
	6.44428		4.26593		9.42029			8.32988		8.65342		11.3799			6.88976		4.94297		7.66497
	3.52262		4.59088		10.4945			7.9242		9.38038		17.4312			5.77977		10.2902		13.1793
	6.32011		6.06706		12.6889			6.79386		7.66871		8.97717			3.77856		9.43649		14.1386
	5.99572		5.29994		10.1138			9.98476		8.49725		12.7867			5.23691		13.7409		8.99436
	5.88957		4.69266		10.8779			3.11122		8.0228		13.2959			2.86596		11.1475		8.82648
	5.13468		3.07612		10.2864			6.33703		8.51236		7.68605			4.61138		10.1043		14.086
	5.16772		4.02145		11.6841			6.61077		6.73276		12.3271			5.55353		14.0103		10.6354
	5.12048		5.08242		7.46784			4.86842		8.80503		10.2833			6.01531		10.8207		8.77797
	9.90207		3.61664		7.42595			4.67464		10.6706		15.873			4.70751		10.502		15.1076
	3.15833		5.56439		8.99247			3.29758		9.55593		11.1583			9.90484		10.933		10.832
	3.1197		5.93248		14.4597			10.1058		10.263		15.6993			4.45093		11.7978		11.8779
	2.48116		4.45434		8.28701			8.27887		3.99096		16.8166			4.13763		8.62024		11.6031
	6.42361		8.03815		12.6025			2.92862		11.4097		17.3521			7.45447		10.1483		16.78
	2.89017		5.345		10.596			9.141		8.4364		14.2247			8.12246		8.27669		12.6899
	6.18762		6.22541		7.27428			5.83529		7.9264		14.3063			5.51754		8.80257		9.382
	8.205		5.26508		6.55738			5.6635		9.24145		18.4393			5.30438		7.43326		12.4267
	4.6031		8.05799		11.6092			5.96		7.87072		17.9434			5.07197		11.1751		13.6816
	4.96868		3.63241		11.9132			8.22785		9.7582		16.0814			7.72901		8.40225		17.5498
			6.67434		10.5833			5.31915		7.87431		16.7623			5.97938		5.73535		15.2696
			7.13184					5.09986							6.82046		8.24034		16.8852
